# Supplementary material
Source: PubMed Central journal article supplement (PMC4771326)
Supplement: AEM.03381-15_zam999116972so1.pdf [file AEM.03381-15_zam999116972so1.pdf]

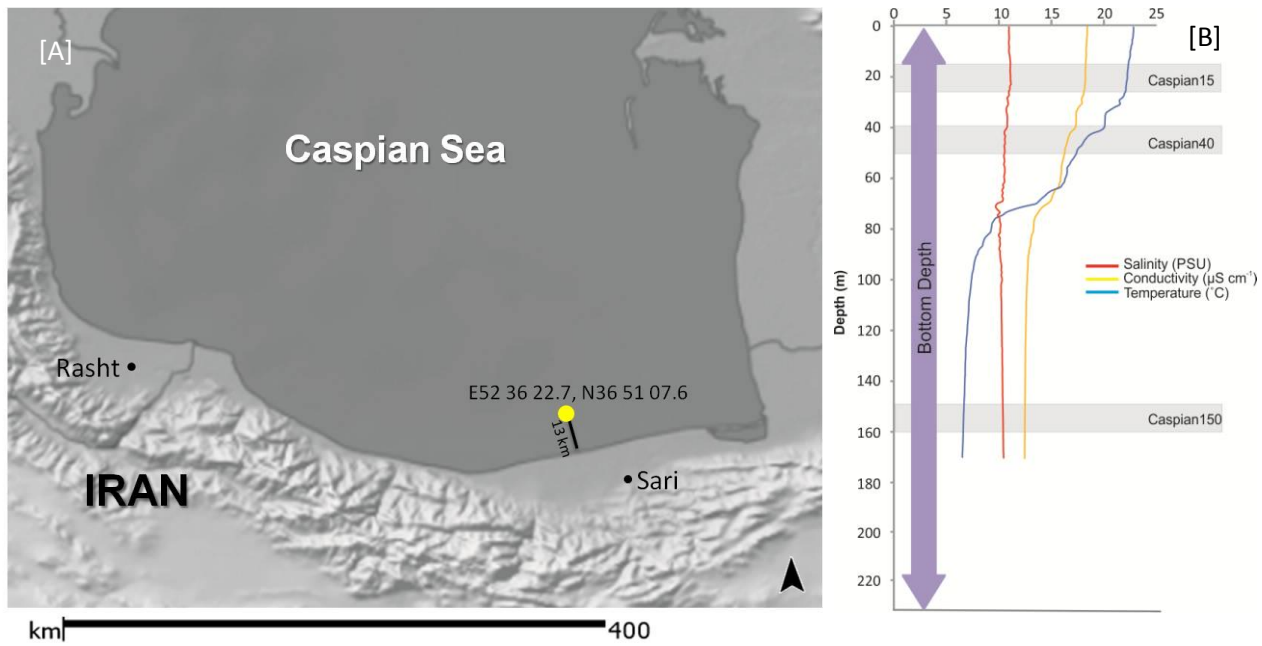

Supplementary Figure 1- [A] the map shows the location of the sampling site. The site is indicated by a yellow marker. The geographical coordinates (latitude, longitude) and the distance from the shore are also shown. A scale (km) is displayed below. The map is a modified version of a map freely available from [www.natureearthdata.com](http://www.natureearthdata.com). [B] CTD profile of Caspian Sea datasets. Salinity, conductivity and temperature along the depth profile are shown.

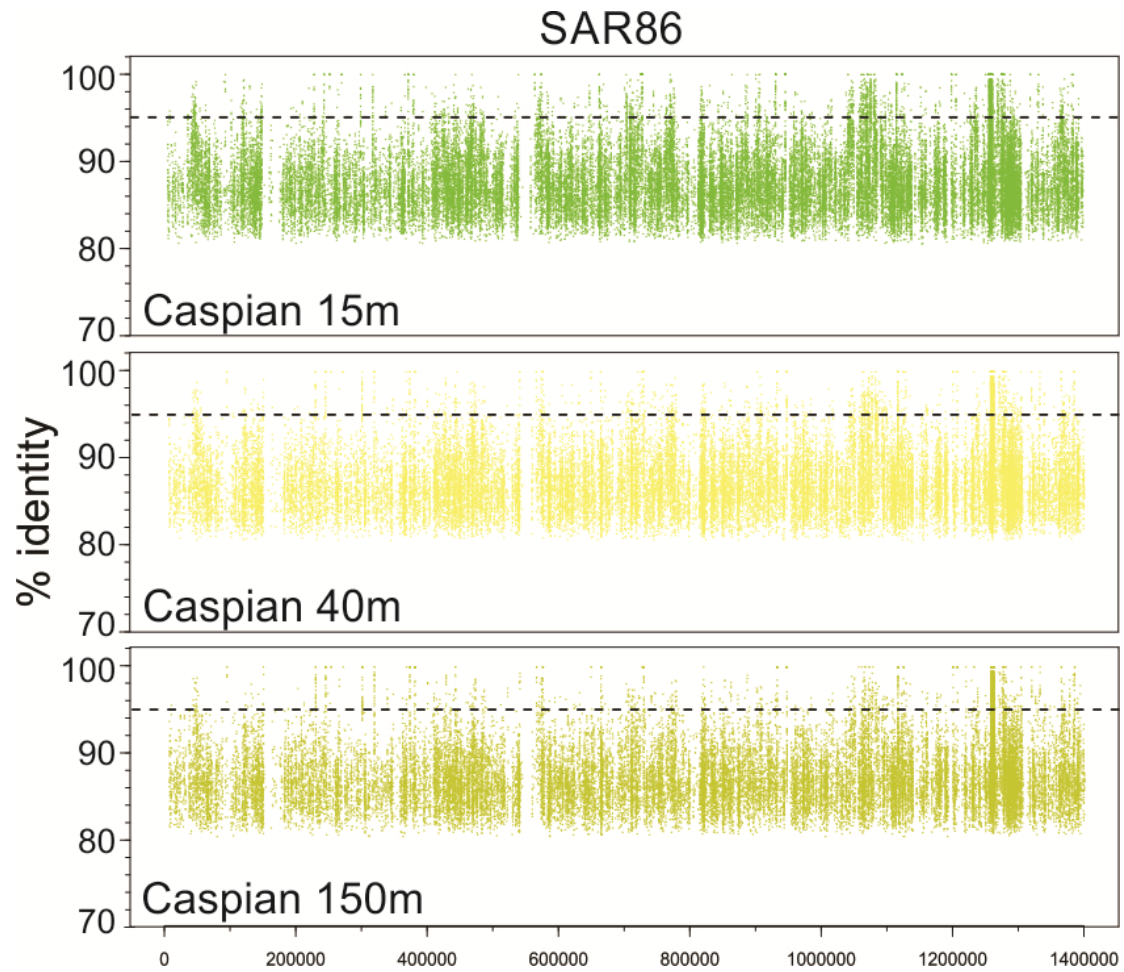

Supplementary Figure 2- Recruitment plot for SAR86E (NCBI Reference Sequence: NZ\_AMWX00000000.1) a single cell genome of the 16S clade SAR86 subgroup IIIa from class *Gammaproteobacteria* against different depth datasets of Caspian Sea.

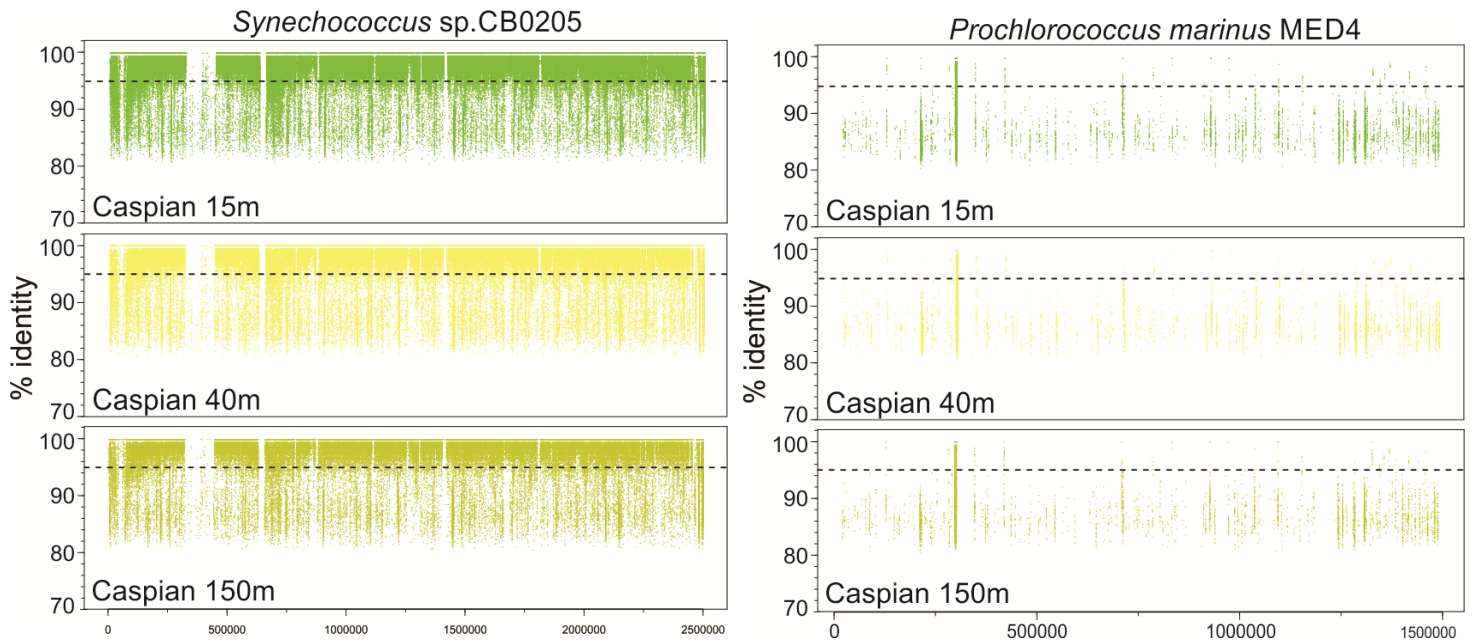

Supplementary Figure 3- Recruitment plot for representatives from phylum *Cyanobacteria* against different depth datasets of Caspian Sea. *Prochlorococcus marinus* MED4 does not exist in Caspian datasets as it is shown in the plot. *Synechococcus* sp.CB0205 is present in Caspian datasets although it was not present in contigs larger than 10Kb which have been assembled from Caspian Datasets.

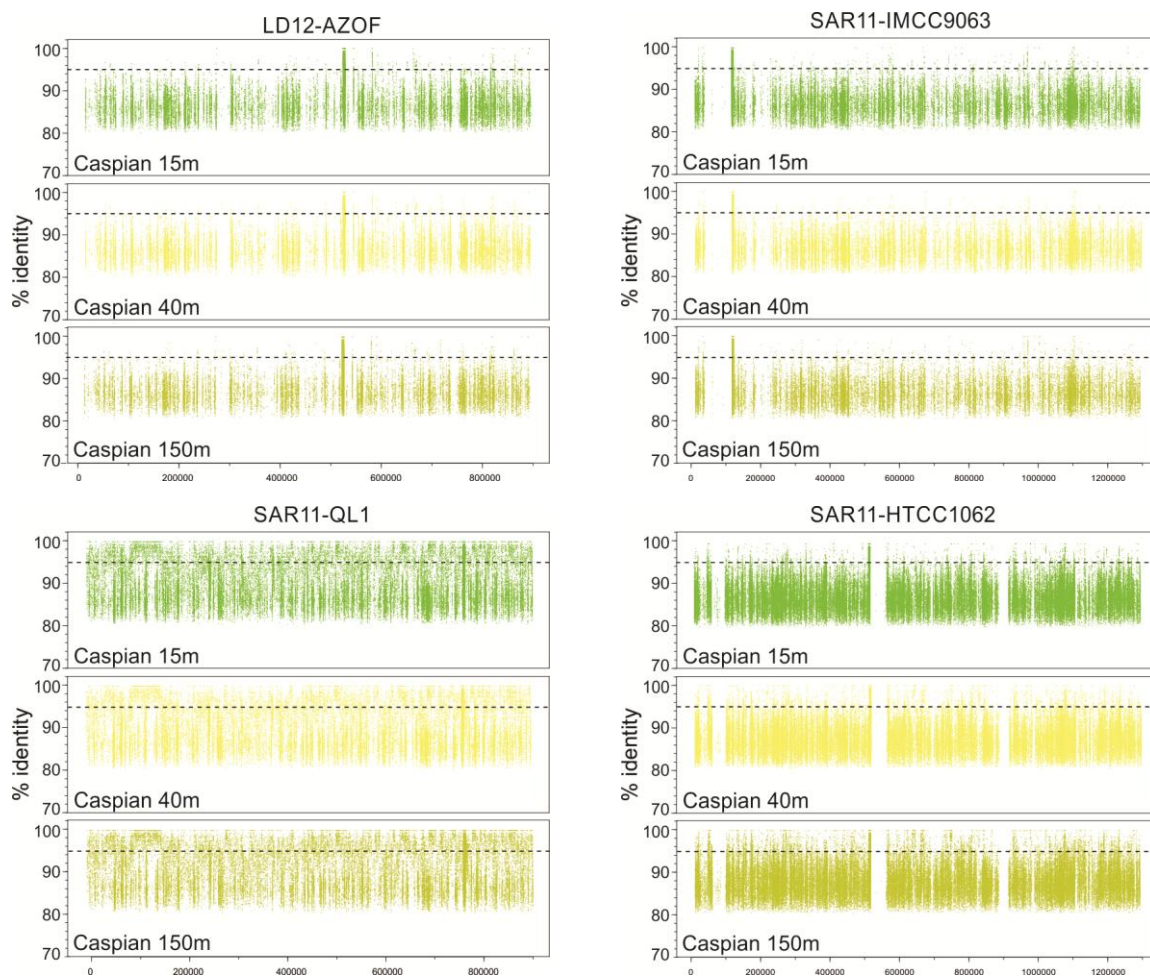

Supplementary Figure 4- recruitment plot for LD12 and 3 SAR11 representatives from phylum *Alphaproteobacteria* against different depth datasets of Caspian Sea. SAR11-QL1 is the isolated strain from brackish lake in china which shows 100% recruitment from Caspian Sea datasets.

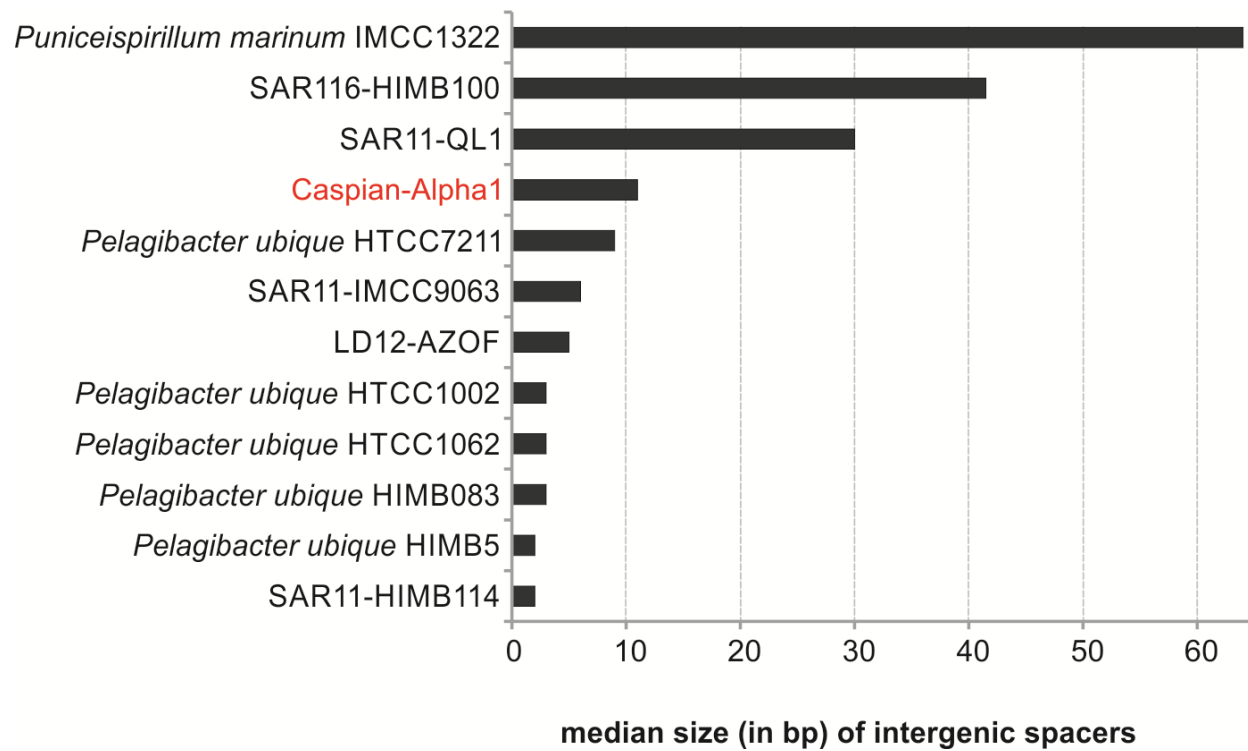

Supplementary Figure 5- Median size of intergenic spacers for selected microbial genomes in *Rickettsiales* order in Phylum *Alphaproteobacteria*. Caspian-Alpha1 is shown in red.

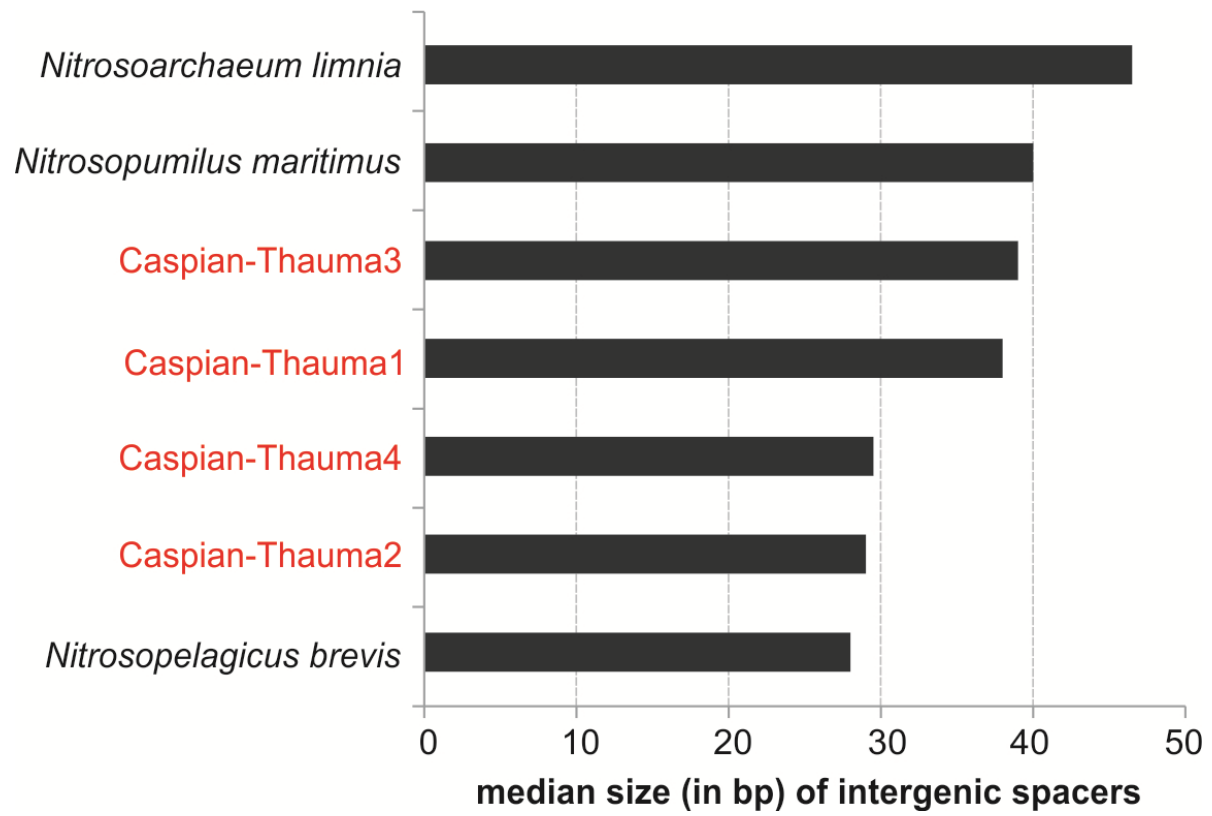

Supplementary Figure 6- Median size of intergenic spacers for selected microbial genomes in Phylum *Thaumarchaeota*. Caspian genomes are shown in red.

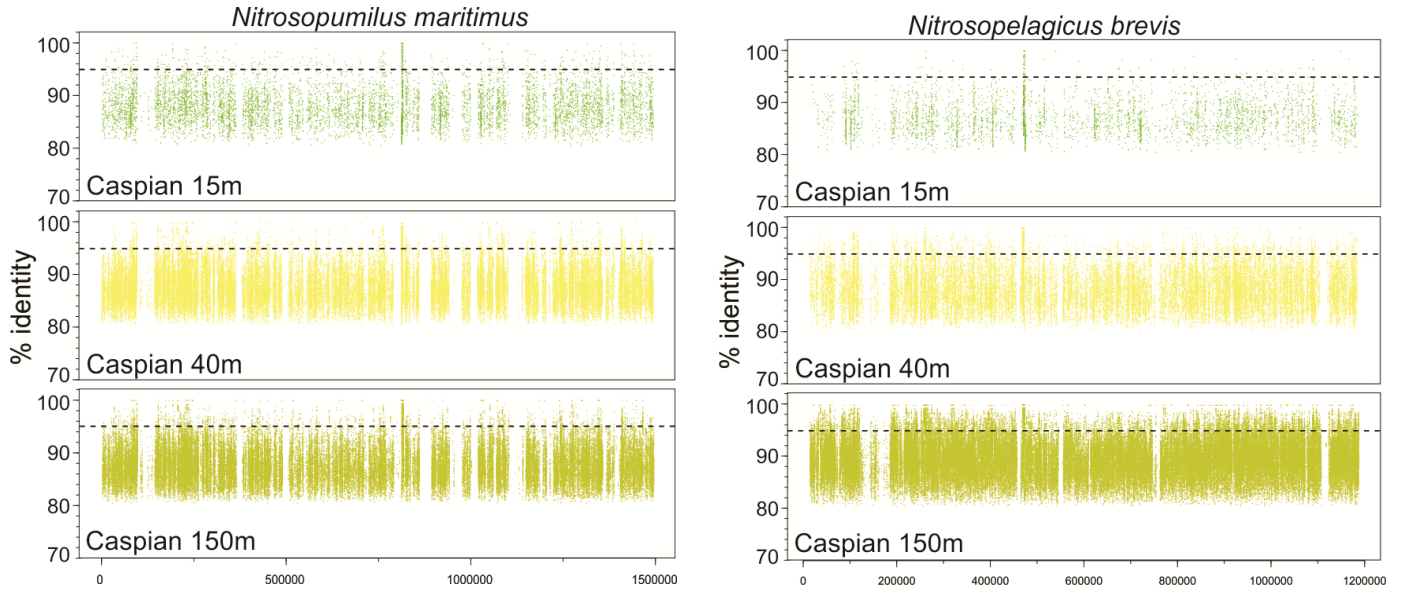

Supplementary Figure 7- recruitment plot for *ca. Nitrosopelagicus brevis* and *Nitrosopumilus maritimus* from phylum *Thaumarchaeota* against different depth datasets of Caspian Sea.

Supplementary Table1- Caspian physicochemical features

| Feature                                               | Caspian Sea                  | Bermuda Atlantic Time-Series                         | Baltic SeaGS695 <sup>f</sup> |
|-------------------------------------------------------|------------------------------|------------------------------------------------------|------------------------------|
| Salinity (%)                                          | 1.1                          | 3.5                                                  | 33.05                        |
| pH                                                    | 8                            | 7.9 <sup>b</sup>                                     | NA                           |
| Chlorophyll ( $\mu\text{g/L}$ )                       | 2.29                         | 0.15 (at Deep Chlorophyll Maximum) <sup>c</sup>      | NA                           |
| Secchi Depth (m)                                      | 6.5                          | NA                                                   | NA                           |
| NO <sub>3</sub> <sup>-</sup> ( $\mu\text{M}$ )        | 1.64 $\pm$ 0.95 <sup>a</sup> | $\leq$ 0.01 <sup>d</sup>                             | 0.495                        |
| NH <sub>4</sub> <sup>+</sup> ( $\mu\text{M}$ )        | 1.01 $\pm$ 0.79 <sup>a</sup> | <0.01 to sporadic observations of >0.08 <sup>d</sup> | 0.472 ( $\mu\text{m/kg}$ )   |
| Dissolved Inorganic Nitrogen (DIN) ( $\mu\text{M}$ )  | 2.65 $\pm$ 1.29 <sup>a</sup> | 0.6 <sup>e</sup>                                     | NA                           |
| Dissolved Inorganic Phosphate (DIP) ( $\mu\text{M}$ ) | 0.70 $\pm$ 0.36 <sup>a</sup> | 0.012 <sup>e</sup>                                   | 0.027 ( $\mu\text{m/kg}$ )   |
| K <sup>+</sup> (mg/L)                                 | 119.2                        | NA                                                   | NA                           |
| Ca <sup>2+</sup> (mg/L)                               | 330.3                        | NA                                                   | NA                           |
| Mg <sup>2+</sup> (mg/L)                               | 799                          | NA                                                   | NA                           |
| Fe (mg/L)                                             | 0.05                         | NA                                                   | NA                           |
| Na <sup>+</sup> (mg/L)                                | 3045                         | NA                                                   | NA                           |

Alphabetic symbols are showing archived data: a (1) b (2) c (3) d (4) e (5) f (6)

Not Available (NA)

## References

1. **Nasrollahzadeh HS, Din Z Bin, Foong SY, Makhloogh A.** 2008. Trophic status of the Iranian Caspian Sea based on water quality parameters and phytoplankton diversity. *Cont Shelf Res* **28**:1153–1165.
2. **Ríos AF, Resplandy L, García-Ibáñez MI, Fajar NM, Velo A, Padin XA, Wanninkhof R, Steinfeldt R, Rosón G, Pérez FF.** 2015. Decadal acidification in the water masses of the Atlantic Ocean. *Proc Natl Acad Sci* **112**:9950–9955.
3. **Cianca A, Godoy JM, Martin JM, Perez-Marrero J, Rueda MJ, Llinás O, Neuer S.** 2012. Interannual variability of chlorophyll and the influence of low-frequency climate modes in the North Atlantic subtropical gyre. *Global Biogeochem Cycles* **26**:n/a–n/a.
4. **Newell SE, Fawcett SE, Ward BB.** 2013. Depth distribution of ammonia oxidation rates and ammonia-oxidizer community composition in the Sargasso Sea. *Limnol Ocean* **58**:1491–1500.
5. **Cavendar-Bares KK, Karl DM, Chisholm SW, Cavender-Bares KK.** 2001. Nutrient gradients in the western North Atlantic Ocean: Relationship to microbial community structure and comparison to pattern in the Pacific Ocean. *Deep Res Part I Oceanogr Res Pap* **48**:2373–2395.
6. **Dupont CL, Larsson J, Yooseph S, Ininbergs K, Goll J, Asplund-Samuelsson J, McCrow JP, Celepli N, Allen LZ, Ekman M, Lucas AJ, Hagström Å, Thiagarajan M, Brindefalk B, Richter AR, Andersson AF, Tenney A, Lundin D, Tovchigrechko A, Nylander J a a, Bami D, Badger JH, Allen**



**AE, Rusch DB, Hoffman J, Norrby E, Friedman R, Pinhassi J, Venter JC, Bergman B.** 2014. Functional tradeoffs underpin salinity-driven divergence in microbial community composition. *PLoS One* **9**:e89549.

Supplementary table2- Prokaryotic community structure based on 16S rRNA reads from unassembled datasets of Caspian Sea depth profile in comparison with freshwater, marine and brackish datasets (Chesapeake Bay, an estuary, and the Baltic Sea salinity gradient).

|                      | <i>Alphaproteobacteria</i> | <i>Actinobacteria</i> | <i>Gammaproteobacteria</i> | <i>Bacteroidetes</i> | <i>Cyanobacteria</i> | <i>Betaproteobacteria</i> | <i>Deltaproteobacteria</i> | <i>Chloroflexi</i> | <i>Planctomycetes</i> | <i>Verrucomicrobia</i> | <i>Acidobacteria</i> | <i>Euryarchaeota</i> | <i>Thaumarchaeota</i> | Other |
|----------------------|----------------------------|-----------------------|----------------------------|----------------------|----------------------|---------------------------|----------------------------|--------------------|-----------------------|------------------------|----------------------|----------------------|-----------------------|-------|
| Lake Lanier          | 6.37                       | 26.09                 | 1.68                       | 3.79                 | 6.73                 | 20.76                     | 6.45                       | 0.42               | 1.68                  | 13.46                  | 0.7                  | 0                    | 0                     | 11.22 |
| Lake Amadorio        | 12.84                      | 36.22                 | 2.27                       | 17.36                | 4.34                 | 8.1                       | 0.34                       | 0.83               | 0.56                  | 5.59                   | 0.08                 | 0.18                 | 0                     | 10.46 |
| Lake Gatun           | 15.81                      | 46.45                 | 1.61                       | 4.84                 | 1.61                 | 2.26                      | 0.97                       | 0                  | 0.32                  | 2.26                   | 9.35                 | 0                    | 4.84                  | 8.39  |
| Amazon River         | 19.39                      | 23.8                  | 8.53                       | 3.58                 | 1.38                 | 22.42                     | 0.83                       | 0.14               | 0.41                  | 2.06                   | 4.13                 | 0.55                 | 2.48                  | 8.54  |
| Chesapeake Bay GS012 | 26.42                      | 39.62                 | 2.52                       | 8.18                 | 0                    | 13.84                     | 0                          | 0                  | 0                     | 1.26                   | 0                    | 0                    | 0                     | 8.18  |
| Baltic GS666         | 16.85                      | 24.64                 | 4.71                       | 14.86                | 8.15                 | 14.86                     | 0.36                       | 0                  | 2.17                  | 5.98                   | 0.72                 | 0                    | 0                     | 6.7   |
| Baltic GS677         | 34.18                      | 22.53                 | 5.57                       | 8.86                 | 14.68                | 6.84                      | 1.27                       | 0                  | 0.51                  | 2.28                   | 0                    | 0                    | 0                     | 3.29  |
| Caspian 15m          | 25.24                      | 22.94                 | 15.05                      | 11.97                | 11.1                 | 3.87                      | 1.69                       | 0.2                | 0.47                  | 1.38                   | 0.06                 | 0.16                 | 0.14                  | 5.61  |
| Caspian 40m          | 24.54                      | 21.76                 | 13.82                      | 10.21                | 9.23                 | 3.38                      | 2.26                       | 1.66               | 1.22                  | 1.55                   | 0.51                 | 0.12                 | 1.62                  | 7.77  |
| Caspian 150m         | 21.13                      | 19.14                 | 13.97                      | 9.15                 | 7.55                 | 3.88                      | 1.82                       | 3.96               | 1.95                  | 2.02                   | 1.33                 | 0.38                 | 2.46                  | 10.36 |
| Baltic GS684         | 28.29                      | 2.45                  | 22.27                      | 21.16                | 12.25                | 1.11                      | 0.22                       | 0                  | 1.78                  | 5.57                   | 0                    | 1.56                 | 0                     | 3.24  |
| Baltic GS688         | 35.21                      | 2.54                  | 20.56                      | 13.24                | 5.07                 | 3.66                      | 1.13                       | 0                  | 0.85                  | 2.25                   | 0                    | 4.51                 | 0.56                  | 10.43 |
| Pacific HOTS         | 30.94                      | 2.32                  | 16.56                      | 5.01                 | 26                   | 0.07                      | 1.02                       | 0.51               | 0.15                  | 1.38                   | 0                    | 2.98                 | 0                     | 13    |
| Atlantic BATS        | 45.42                      | 1.64                  | 16.39                      | 5.01                 | 13.69                | 0.29                      | 0.39                       | 0.19               | 0.19                  | 1.45                   | 0                    | 1.25                 | 0                     | 14.08 |
| Mediterranean DCM    | 41.06                      | 2.92                  | 15.41                      | 10.01                | 11.47                | 1.01                      | 0.11                       | 0                  | 0.11                  | 1.12                   | 0                    | 4.5                  | 0                     | 12.14 |
